# Supplementary material for: Immunomodulatory Macrophages Enable E-MNC Therapy for Radiation-Induced Salivary Gland Hypofunction
Source: MDPI journal article supplement (doi:10.3390/cells12101417), 2023-05-17
Supplement: s1 [file s1]

**Supplemental Table S1.** Recombinant proteins of mouse 5G culture medium [8].

| recombinant proteins | company, catalog No. | concentration |
|----------------------|----------------------|---------------|
| mouse SCF            | Peprotech, 250-03    | 100 ng/ml     |
| mouse Flt-3 ligand   | Peprotech, 250-31L   | 100 ng/ml     |
| mouse TPO            | Peprotech, 315-14    | 20 ng/ml      |
| mouse VEGF           | Peprotech, 450-32    | 50 ng/ml      |
| mouse IL-6           | Peprotech, 216-16    | 20 ng/ml      |

**Supplemental Table S2-1.** Mouse antibodies for flow cytometric analysis.

| <b>antibodies</b>                                  | <b>company, catalog No.</b> |
|----------------------------------------------------|-----------------------------|
| APC-Cy7 anti-mouse/human CD11b                     | Biolegend, 101225           |
| APC/Cy7 Rat IgG2b, $\kappa$ isotype Ctrl Antibody  | Biolegend, 400623           |
| APC anti-mouse CD206 (MMR)                         | Biolegend, 141707           |
| APC Rat IgG2a, $\kappa$ Isotype Ctrl Antibody      | Biolegend, 400511           |
| PE anti-mouse CD3                                  | Biolegend, 100205           |
| PE Rat IgG2b, $\kappa$ isotype Ctrl Antibody       | Biolegend, 400607           |
| APC-Cy7 anti-mouse CD4                             | Biolegend, 100413           |
| APC-Cy7 Rat IgG2b, $\kappa$ isotype Ctrl Antibody  | Biolegend, 400623           |
| FITC anti-mouse/human CD45R/B220                   | Biolegend, 103205           |
| FITC Rat IgG2a, $\kappa$ isotype Ctrl Antibody     | Biolegend, 400505           |
| APC anti-mouse CCR2                                | R&D, FAB5538A               |
| APC Rat IgG2b, $\kappa$ isotype Ctrl Antibody      | Biolegend, 400611           |
| FITC anti-mouse Msr1(CD204)                        | BIO-RAD, MCA1322FT          |
| FITC Rat IgG2b, $\kappa$ isotype Ctrl Antibody     | BD, 553988                  |
| FITC anti-mouse CD183 (CXCR3)                      | Biolegend, 126535           |
| FITC Armenian hamster IgG, isotype Ctrl Antibody   | Biolegend, 400905           |
| PE/Cy7 anti-mouse CD194 (CXCR4)                    | Biolegend, 131213           |
| PE/Cy7 Armenian hamster IgG, isotype Ctrl Antibody | Biolegend, 400921           |
| APC anti-mouse CD196 (CCR6)                        | Biolegend, 129813           |
| APC Armenian hamster IgG, isotype Ctrl Antibody    | Biolegend, 400911           |
| PE-Cy7 anti-mouse/human Mac-2 (Galectin-3)         | Biolegend, 125417           |
| PE-Cy7 Rat IgG2a, $\kappa$ isotype Ctrl Antibody   | Biolegend, 400521           |
| True-Stain Monocyte Blocker™                       | Biolegend, 426102           |
| PI                                                 | WAKO, 169-26281             |

**Supplemental Table S2-2.** Human antibodies for flow cytometric analysis.

| <b>antibodies</b>                                  | <b>company, catalog No.</b>  |
|----------------------------------------------------|------------------------------|
| PE-Cy7 mouse IgG1, $\kappa$ isotype Ctrl Antibody  | Biolegend, 400126            |
| PE-Cy7 anti-human CD11b                            | Biolegend, 301322            |
| APC-Cy7 mouse IgG1, $\kappa$ isotype Ctrl Antibody | Biolegend, 400128            |
| APC-Cy7 anti-human CD206                           | Biolegend, 321120            |
| FcR Blocking Reagent, human                        | Miltenyi Biotec, 130-059-901 |
| PI                                                 | WAKO, 169-26281              |

**Supplemental Table S3-1.** Mouse primers.

| gene          | forward                      | reverse                     |
|---------------|------------------------------|-----------------------------|
| IL-1 $\beta$  | 5'-GCTGAAAGCTCTCCACCTCA-3'   | 5'-AGGCCACAGGTATTTTGTCG-3'  |
| IL-10         | 5'-GCTGGACAACATACTGCTAACC-3' | 5'-ATTCCGATAAGGCTTGGCAA-3'  |
| IFN- $\gamma$ | 5'-ACAGCAAGGCGAAAAAGGATG-3'  | 5'-TGGTGGACCACTCGGATGA-3'   |
| VEGF-A        | 5'-CCTCCGAAACCATGAACTTT-3'   | 5'-TCATGGGACTTCTGCTCTCC-3'  |
| IL-6          | 5'-CCACTCCCAACAGACCTGTC-3'   | 5'-GCAAGTGCATCATCGTTGTTC-3' |
| CD206         | 5'-CCACAGCATTGAGGAGTTTG-3'   | 5'-ACAGCTCATCATTTGGCTCA-3'  |
| IGF1          | 5'-CACACCTCTTCTACCTGGCG-3'   | 5'-AGCCTGTGGGCTTGTGAAG-3'   |
| TGF- $\beta$  | 5'-GGACTCTCCACCTGCAAGAC-3'   | 5'-GACTGGCGAGCCTTAGTTTG-3'  |
| TLR2          | 5'-AACTCTGACCCGCCCTTTAA-3'   | 5'-AGCCTGAAGTGGGAGAAGTC-3'  |
| TLR4          | 5'-CTGCATAGAGGTAGTTCCTA-3'   | 5'-AATTTACACCTGGATAAAT-3'   |
| NGF           | 5'-ATGGGGGAGTTCTCAGTGTG-3'   | 5'-GCACCCACTCTCAACAGGAT-3'  |
| Car3          | 5'-CTTGATGCCCTGGACAAAAT-3'   | 5'-AGCTCACAGTCATGGGCTCT-3'  |
| MMP9          | 5'-CGTCATTCGCGTGGATAAGG-3'   | 5'-TTTGGAAGTACACGCCAG-3'    |
| GAPDH         | 5'-TGCACCACCAACTGCTTAG-3'    | 5'-GGATGCAGGGATGATGTTC-3'   |

**Supplemental Table S3-2.** Human primers.

| gene          | forward                     | reverse                        |
|---------------|-----------------------------|--------------------------------|
| IL-1 $\beta$  | 5'-CACAGACCTTCCAGGAGAAT-3'  | 5'-TTCAACACGCAGGACAGGTA-3'     |
| TNF- $\alpha$ | 5'-AATGGCGTGGAGCTGAGA-3'    | 5'-TAGACCTGCCCAGACTCGG-3'      |
| IFN- $\gamma$ | 5'-CTGTTACTGCCAGGACCCAT-3'  | 5'-ACACTCTTTTGATGCTCTGGT-3'    |
| GAPDH         | 5'-GGAGTCCACTGGCGTCTTCAC-3' | 5'-GCTGATGATCTTGAGGCTGTTGTC-3' |

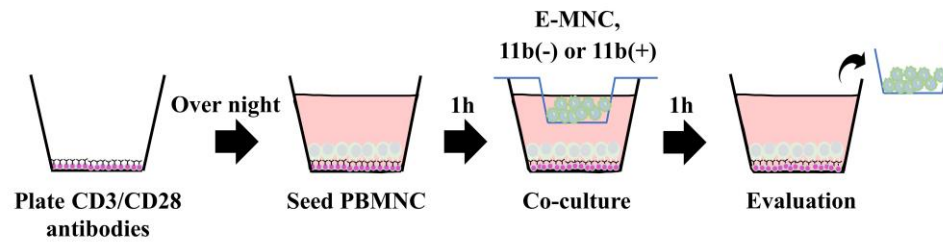

**Supplemental Figure S1.** Schematic diagram describing the experimental design for co-culture of E-MNCs and T-cell-activated PBMNCs. Anti-CD3 and -CD28 antibodies were added to the wells of a 24-well plate and incubated overnight. Then, PBMNCs were seeded to the wells and cultured at 37°C for 1 h. Subsequently, E-MNCs, 11b(–) cells, or 11b(+) cells were seeded to the upper chamber and co-cultured with stimulated PBMNCs at 37°C for 1 h. Finally, co-cultured PBMNCs were collected and analyzed.

**A.**

**PBMNC (day 0)**

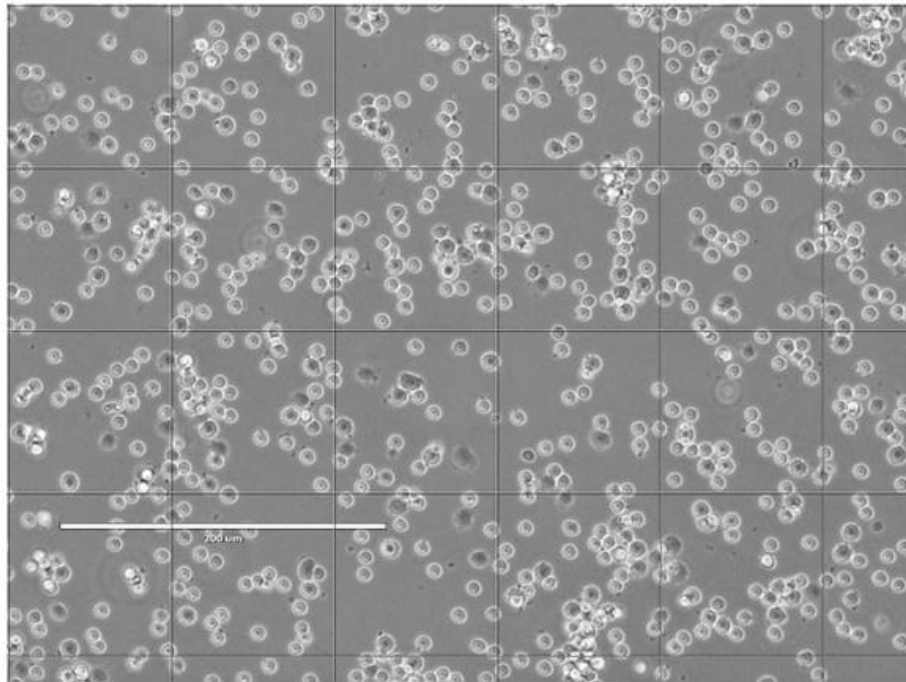

**E-MNC (day 7)**

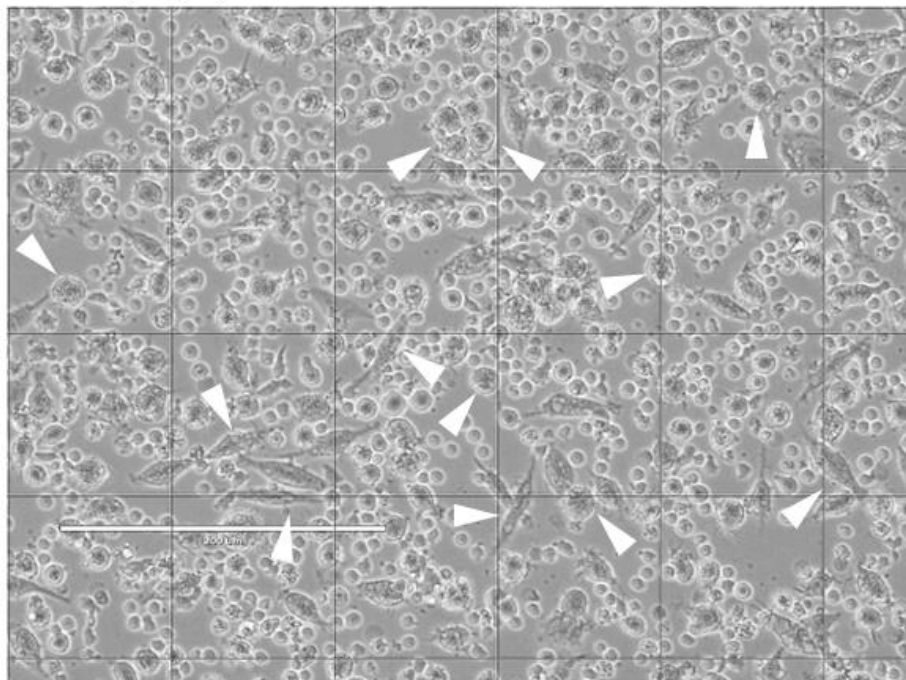

**Supplemental Figure S2.** Characteristics of human E-MNCs. (A) Phase-contrast imaging of PBMNCs (day 0) and E-MNCs (day 7). White arrows indicate round- and spindle-shaped macrophage-like cells (white arrows). Scale bar; 200  $\mu$  m.

**A.**

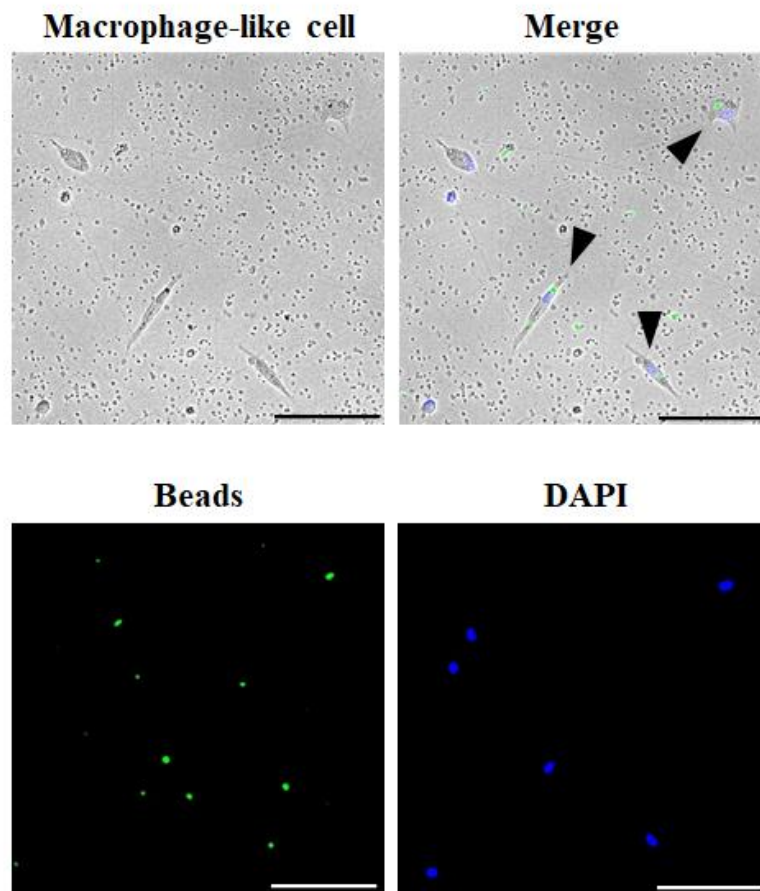

**Supplemental Figure S3.** Characteristics of human E-MNCs. **(A)** Phagocytosis assay with fluorescent beads. Phase-contrast and fluorescence microscopic images of macrophage-like round- and spindle-shaped cells (black arrows) among E-MNCs at 1 h. Green, fluorescent beads; Blue, DAPI. Scale bar 100 $\mu$ m.

A.

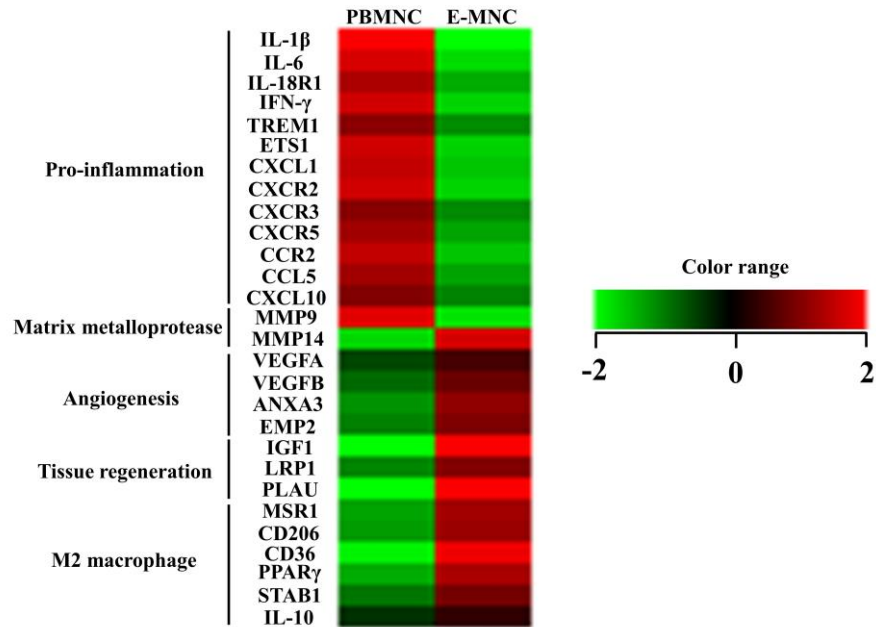

**Supplemental Figure S4.** Microarray analysis of PBMNCs and E-MNCs. **(A)** Heat map showing down-regulated and up-regulated genes associated with inflammation, matrix metalloproteases, angiogenesis, tissue regeneration, and M2-macrophages in PBMNCs (day 0) and E-MNCs (day 5). Red color indicates relatively higher expression, and green color indicates relatively lower expression.

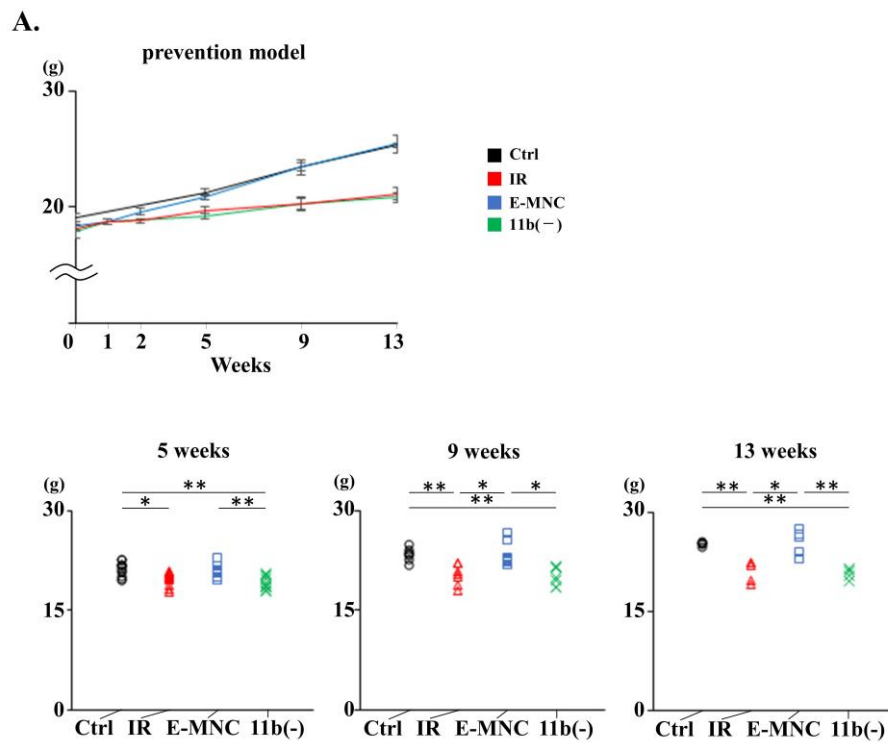

**Supplemental Figure S5.** Changes in body weight in the prevention mouse model after transplantation. **(A)** Change in body weight in each group at 1, 2, 5, 9, and 13 weeks post-IR (upper graph) and scatter diagram of body weight in each specimen at 5, 9, and 13 weeks post-IR (lower graphs) (\* $P < 0.05$ , \*\* $P < 0.01$ ).



**A.**

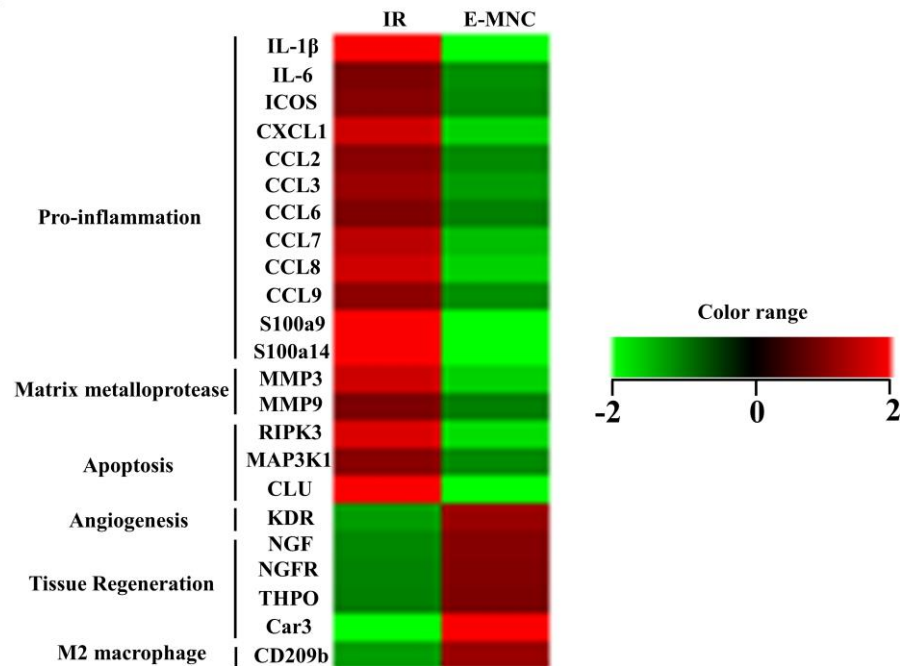

**B.**

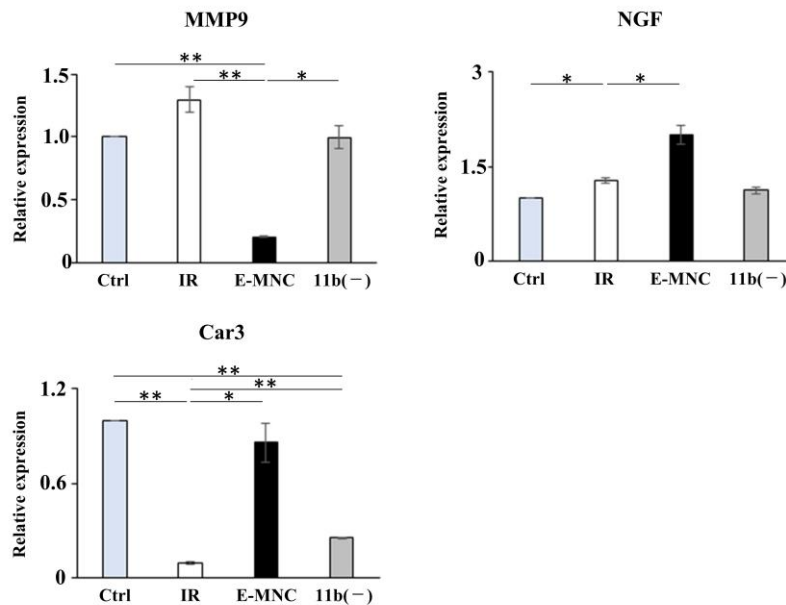

**Supplemental Figure S6.** Microarray and qPCR analyses of transplanted specimens at 2 weeks post-IR. **(A)** Heat map showing down-regulated and up-regulated genes associated with inflammation, matrix metalloproteases, apoptosis, angiogenesis, tissue regeneration, and M2-macrophages in the IR- and E-MNC-groups. Red color indicates relatively higher expression, and green color indicates relatively lower expression. **(B)** Expression of mRNAs of genes encoding MMP9, NGF, and Car3 in each group (\* $P$ <0.05, \*\* $P$ <0.01).

A.

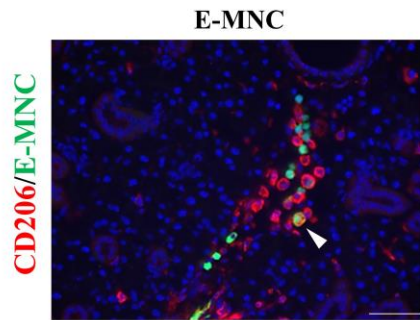

B. damage-established model

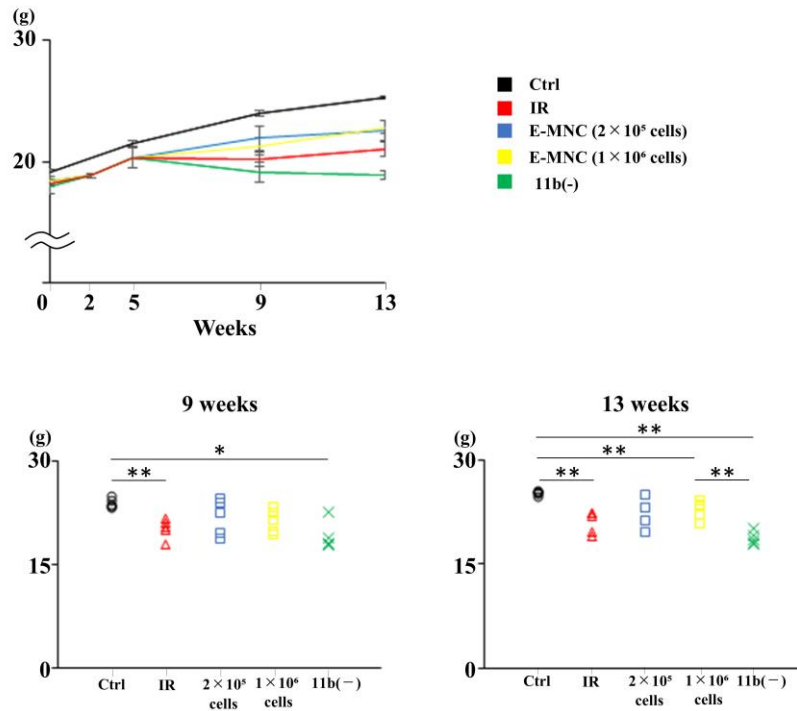

**Supplemental Figure S7.** Immunohistological observations at 10 days post-IR and changes in body weight after transplantation. (A) CD206-expressing cells (red) at the periphery of transplanted E-MNCs (green). Blue, DAPI. Scale bar, 50  $\mu$ m. (B) Changes in body weight in each group of the established model at 2, 5, 9, and 13 weeks post-IR (upper graph), and scatter diagram of body weight in each specimen at 9 and 13 weeks post-IR (lower graphs) (\* $P < 0.05$ , \*\* $P < 0.01$ ).
